# Supplementary material for: Lymph node staging systems in patients with gastric cancer treated with D2 resection plus adjuvant chemotherapy
Source: PubMed Central journal article supplement — J Cancer. 2018 Jan 6;9(4):660–6. doi: 10.7150/jca.22016 (PMC5858487; doi:10.7150/jca.22016), 2018-01-06

**Supplementary Figure 1. Scatter plots showing relationships within different lymph node staging systems among patients with D2-resected gastric cancer receiving AC. Distribution curves of (A) LODDS vs. MLN; (B) LNR vs. MLN; (C) LODDS vs. LNR.**

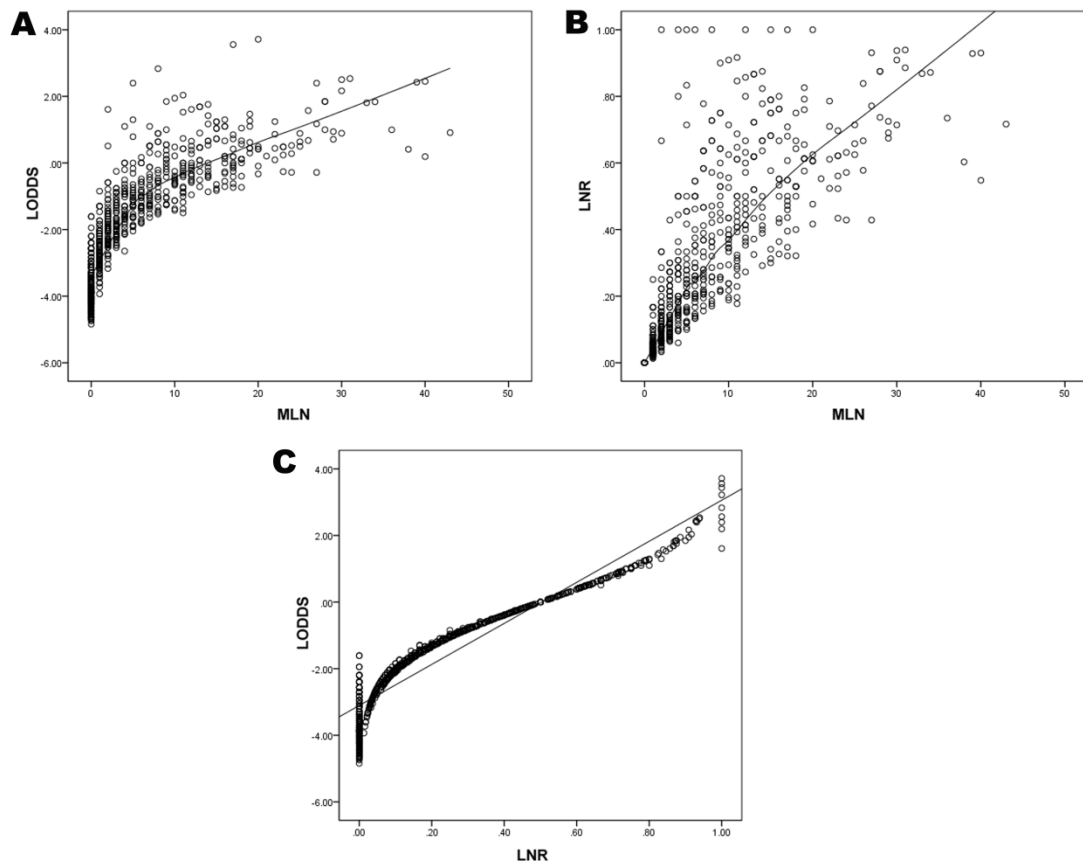

Supplement: jcav09p0660s1.pdf [file jcav09p0660s1.pdf]
